# Supplementary material for: Ni–CoSe 2 heterojunction coated by N-doped carbon for modified separators of high-performance Li–sulfur batteries
Source: Royal Society of Chemistry journal article supplement (doi:10.1039/d4ra01660b), 2024-01-01
Supplement: d4ra01660b1.pdf [file d4ra01660b1.pdf]

## Supporting Information

### Ni-CoSe<sub>2</sub> heterojunction coated by N-doped carbon for modified separators of high-performance Li-sulfur batteries

Kai Wang,<sup>a</sup> Haiqin Yang,<sup>a</sup> Ruiqiang Yan,<sup>\*a</sup> Cairong Chen,<sup>b</sup> Chenglin Wu,<sup>ac</sup> Wei Chen,<sup>a</sup> Zhicai He,<sup>a</sup> Guobo Huang,<sup>\*a</sup> and Ling Chang<sup>\*acd</sup>

<sup>a</sup> School of Pharmaceutical and Chemical Engineering, Taizhou University, Taizhou 318000, China

<sup>b</sup> Taizhou Prefectural Center for Disease Control and Prevention, Taizhou 318000, China

<sup>c</sup> Biomedical Industry Research Institute of Taizhou, Taizhou University, Taizhou 318000, China

<sup>d</sup> Department of Chemistry, Zhejiang University, Hangzhou 310027, China

\* Correspondence: yanrq@tzc.edu.cn (R.Q.Y.); 513493405@qq.com (G.B.H.); changling@zju.edu.cn (L.C.).

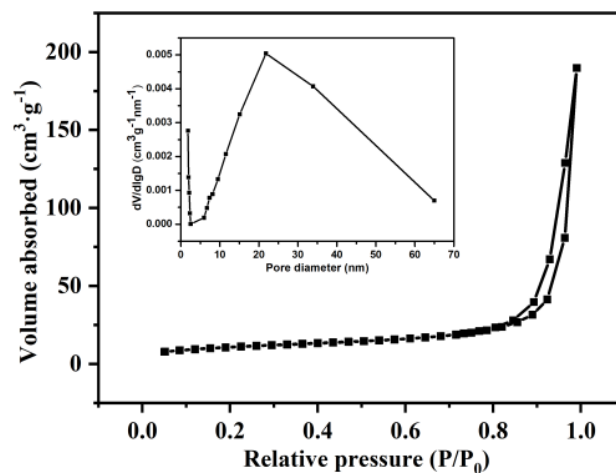

Fig. S1 BET and pore-size distribution of the Ni-CoSe<sub>2</sub>@NC composite.

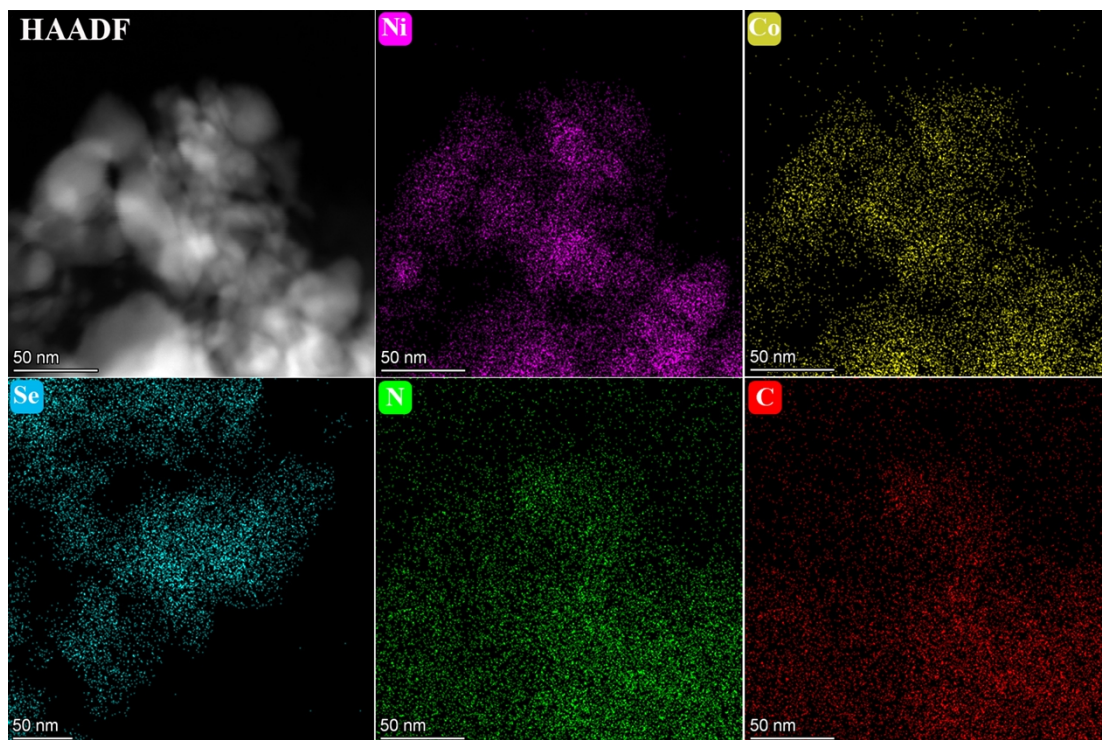

Fig. S2 EDS mapping of Ni-CoSe<sub>2</sub>@NC composite.

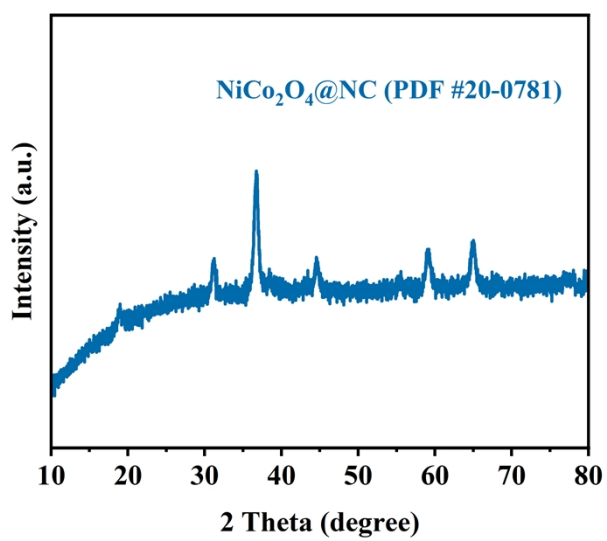

Fig. S3 XRD pattern of the NiCo<sub>2</sub>O<sub>4</sub>@NC intermediate.

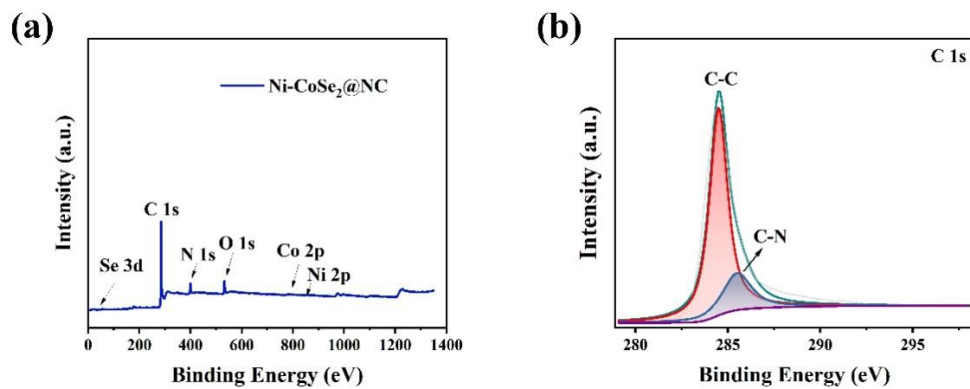

**Fig. S4** XPS survey spectra of (a) Ni-CoSe<sub>2</sub>@NC and (b) C 1s.

**Fig. S5** Tafel plots fitted from CV curves. (a) The transition reactions from S<sub>8</sub> to Li<sub>2</sub>S<sub>n</sub>, (b) from Li<sub>2</sub>S<sub>n</sub> to Li<sub>2</sub>S and (c) from Li<sub>2</sub>S to Li<sub>2</sub>S<sub>n</sub>.

**Fig. S6** (a) CV curves of symmetrical batteries assembled with a Li<sub>2</sub>S<sub>6</sub> electrolyte and (b) potentiostatic discharge profiles for Li<sub>2</sub>S nucleation tests.

**Fig. S7** Post-cycling XPS spectra of Ni-CoSe<sub>2</sub>@NC composite.

**Fig. S8** The cycling performance when Ni-CoSe<sub>2</sub>@NC modified side facing the lithium anode.
